# Supplementary material for: Detection of Frog Virus 3 by Integrating RPA-CRISPR/Cas12a-SPM with Deep Learning
Source: PubMed Central journal article supplement — ACS Omega. 2023 Aug 25;8(36):32555–64. doi: 10.1021/acsomega.3c02929 (PMC10500685; doi:10.1021/acsomega.3c02929), 2023-08-25
Supplement: ao3c02929_si_001.pdf [file ao3c02929_si_001.pdf]

**Title**

Detection of Frog virus 3 by integrating RPA-CRISPR/Cas12a-SPM with deep learning

**Authors**

Zhengyang Lei <sup>a,b,†</sup>, Lijin Lian <sup>a,b,†</sup>, Likun Zhang <sup>a,b,†</sup>, Changyue Liu <sup>a,b</sup>, Shiyao Zhai <sup>a,b</sup>, Xi Yuan <sup>a,b</sup>, Jiazhang Wei <sup>c</sup>, Hong Liu <sup>d</sup>, Ying Liu <sup>d</sup>, Zhicheng Du <sup>a,b</sup>, Ijaz Gul <sup>a,b</sup>, Haihui Zhang <sup>a,b</sup>, Zhifeng Qin <sup>e</sup>, Shaoling Zeng <sup>e</sup>, Peng Jia <sup>f</sup>, Ke Du <sup>g</sup>, Lin Deng <sup>h</sup>, Dongmei Yu <sup>i,\*</sup>, Qian He <sup>a,b</sup>, Peiwu Qin <sup>a,b,\*</sup>

\*Email: pwqin@sz.tsinghua.edu.cn. Address: Lishui Road 2199, Nanshan District, Shenzhen, China 518055.

†This author contributed equally to this paper

**Affiliations**

<sup>a</sup> *Center of Precision Medicine and Healthcare, Tsinghua-Berkeley Shenzhen Institute, Shenzhen, Guangdong Province, 518055, China.*

<sup>b</sup> *Institute of Biopharmaceutics and Health Engineering, Tsinghua Shenzhen International Graduate School, Shenzhen, Guangdong Province, 518055, China.*

<sup>c</sup> *Department of Otolaryngology & Head and Neck, The People's Hospital of Guangxi Zhuang Autonomous Region, Guangxi Academy of Medical Sciences, 6 Taoyuan Road, Nanning, 530021, China.*

<sup>d</sup> *Animal and Plant Inspection and Quarantine Technical Centre, Shenzhen Exit and Entry Inspection and Quarantine Bureau, Guangdong Province, 518045, China.*

<sup>e</sup> *Animal and Plant Inspection and Quarantine Technology Center, Shenzhen Customs, Shenzhen, Guangdong Province, 518033, China.*

<sup>f</sup> *Quality and Standards Academy, Shenzhen Technology University, Shenzhen 518118, China.*

<sup>g</sup> *Department of Chemical and Environmental Engineering, University of California, Riverside, 92521, United States.*

<sup>h</sup> *Shenzhen Bay Laboratory, Shenzhen, 518132, China.*

<sup>i</sup> *School of Mechanical, Electrical & Information Engineering, Shandong University, Weihai, Shandong, 264209, China.*

**Table S1** Oligonucleotides used in this study.

|                  |                                                                                                                                                                                                                                                                                          |
|------------------|------------------------------------------------------------------------------------------------------------------------------------------------------------------------------------------------------------------------------------------------------------------------------------------|
| FV3 MCP          | 5'-<br>ATGTCTTCTGTAAGTGGTTCAGGTATCACAAGTGGTTTCATCGAC<br>TTGGCCACTTATGACAATCTTGAGAGAGCAATGTACGGGGGTTT<br>GGACGCCACCACGTACTTTGTCAAGGAGCACTACCCCGTGGGGT<br>GGTTCACCAAGCTGCCGTCTCTGGCTGCCAAGATGTCGGGTAACC<br>CGGCTTTCGGGCAGCAGTTTTTCGGTTCGGCGTCCAGGTTCGGGGG<br>ATTACATCCTCAACGCC -3' (240bp) |
| ISKNV MCP        | 5'-<br>ATGTCTGCAATCTCAGGTGCAAACGTAACCAGCGGGTTCATCGA<br>CATCTCCGCGTTTGATGCGATGGAGACCCACTTGTACGGCGGCG<br>ACAATGCCGTGACCTACTTTGCCCGTGAGACCGTGCCTAGTTCCT<br>GGTACAGCAAACGTCACCTGTCAAAAACAGACTGGCCAT<br>GCCAATTTTGGGCAGGAGTTTAGTGTGACGGTGGCGAGGGGCGG<br>CGACTACCTC -3' (231bp)                |
| RPA primer F1    | ATGTCTTCTGTAAGTGGTTCAGGTATCACAAG                                                                                                                                                                                                                                                         |
| RPA primer F2    | ATGTCTTCTGTAAGTGGTTCAGGTATCACA                                                                                                                                                                                                                                                           |
| RPA primer F3    | TCTTCTGTAAGTGGTTCAGGTATCACAAGTGGT                                                                                                                                                                                                                                                        |
| RPA primer R1    | GGCGTTGAGGATGTAATCCCCGACCTGGG                                                                                                                                                                                                                                                            |
| RPA primer R2    | GGCGTTGAGGATGTAATCCCCGACCTGGGAA                                                                                                                                                                                                                                                          |
| RPA primer R3    | CGTTGAGGATGTAATCCCCGACCTGGGAACG                                                                                                                                                                                                                                                          |
| FV3 MCP PCR-F    | ATGTCTTCTGTAAGTGGTTC                                                                                                                                                                                                                                                                     |
| FV3 MCP PCR-R    | GGCGTTGAGGATGTAATCCCC                                                                                                                                                                                                                                                                    |
| ISKNV MCP F      | ATGTCTGCAATCTCAGGTGC                                                                                                                                                                                                                                                                     |
| ISKNV MCP R      | GAGGTAGTCGCCGCCCT                                                                                                                                                                                                                                                                        |
| MCP qPCR-F       | GGTTCAGGTATCACAAGTGGT                                                                                                                                                                                                                                                                    |
| MCP qPCR-R       | GCGTTGAGGATGTAATCCC                                                                                                                                                                                                                                                                      |
| LbCas12a crRNA-1 | uaauuucuacuaaguguagauATCGACTTGGCCACTTATGACAA                                                                                                                                                                                                                                             |
| LbCas12a crRNA-2 | uaauuucuacuaaguguagauTCAAGGAGCACTACCCCGTGGGG                                                                                                                                                                                                                                             |
| LbCas12a crRNA-3 | uaauuucuacuaaguguagauGGCAGCAGTTTTTCGGTTCGGCGT                                                                                                                                                                                                                                            |
| ssDNA reporter   | /5TAMRA/TTATT/3BHQ2                                                                                                                                                                                                                                                                      |

**Table S2** The information of animal-derived samples used in this study.

| Pathogens                             | Host                         | Region           | Refs             |
|---------------------------------------|------------------------------|------------------|------------------|
| <i>Tiger frog virus</i>               | <i>Rana tigrina rugulosa</i> | Guangdong, China | Unpublished      |
| <i>Soft-shelled turtle iridovirus</i> | <i>Trionyx Sinensis</i>      | Guangdong, China | Zhao et al. 2007 |
| <i>Bohle iridovirus</i>               | <i>Emydura krefftii</i>      | Guangdong, China | Unpublished      |
| <i>Rana Grylio iridovirus</i>         | <i>Rana Grylio</i>           | Guangdong, China | Unpublished      |

**Table S3** Deep learning models performance for binary classification.

| Models<br>Index | DenseNet-121 | AlexNet | EfficientNet-B7 |
|-----------------|--------------|---------|-----------------|
| Accuracy        | 100.00%      | 100.00% | 100.00%         |
| Precision       | 100.00%      | 100.00% | 100.00%         |
| Recall          | 100.00%      | 100.00% | 100.00%         |
| F1 Score        | 100.00%      | 100.00% | 100.00%         |
| Inference Time  | 38ms         | 24ms    | 48ms            |

**Table S4** Deep learning models performance for multiclass classification.

| Models<br>Index | DenseNet-121 | AlexNet | EfficientNet-B7 |
|-----------------|--------------|---------|-----------------|
| Accuracy        | 97.50%       | 98.75%  | 97.50%          |
| Precision       | 97.67%       | 98.85%  | 97.66%          |
| Recall          | 97.50%       | 98.75%  | 97.50%          |
| F1 Score        | 97.48%       | 98.75%  | 97.47%          |
| Inference Time  | 31ms         | 15ms    | 41ms            |

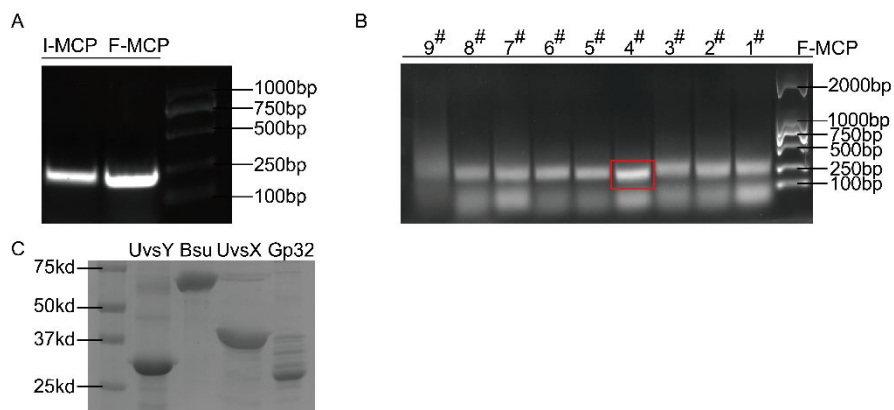

**Figure S1.** Optimization of RPA primers and crRNA. **(A)** Agarose gel electrophoresis for purified target and control fragment. I-MCP: ISKNV MCP, F-MCP: FV3 MCP. **(B)** Result of agarose gel electrophoresis for evaluation of RPA efficiency. 1 nM purified target is used. 1# represents RPA primer F1 and RPA primer R1. The 4<sup>th</sup> pair of primers shows better amplification efficiency (RPA primer F2 and RPA primer R1). **(C)** The molecular weight of purified proteins for RPA is confirmed by SDS-PAGE.

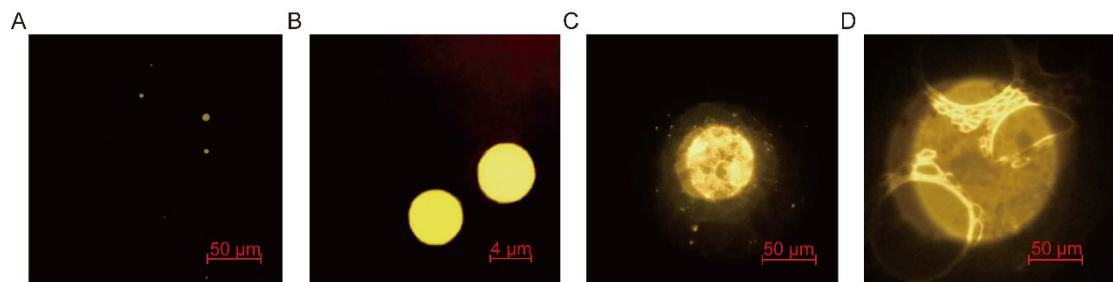

**Figure S2.** Images of standard samples with SPM. **(A)** Detection of mixture beads with the diameter of 0.1 μm, 0.2 μm, 0.5 μm, 1 μm, and 4 μm (TstraSpeck Fluorescent Microspheres Size Kit (T14792)). The excitation

wavelength and the emission wavelength are 560 nm and 580 nm, respectively. **(B)** The image of 4  $\mu\text{m}$  fluorescent beads. **(C)** The image of the potato's underground stem. **(D)** The image of the potato's stem tube

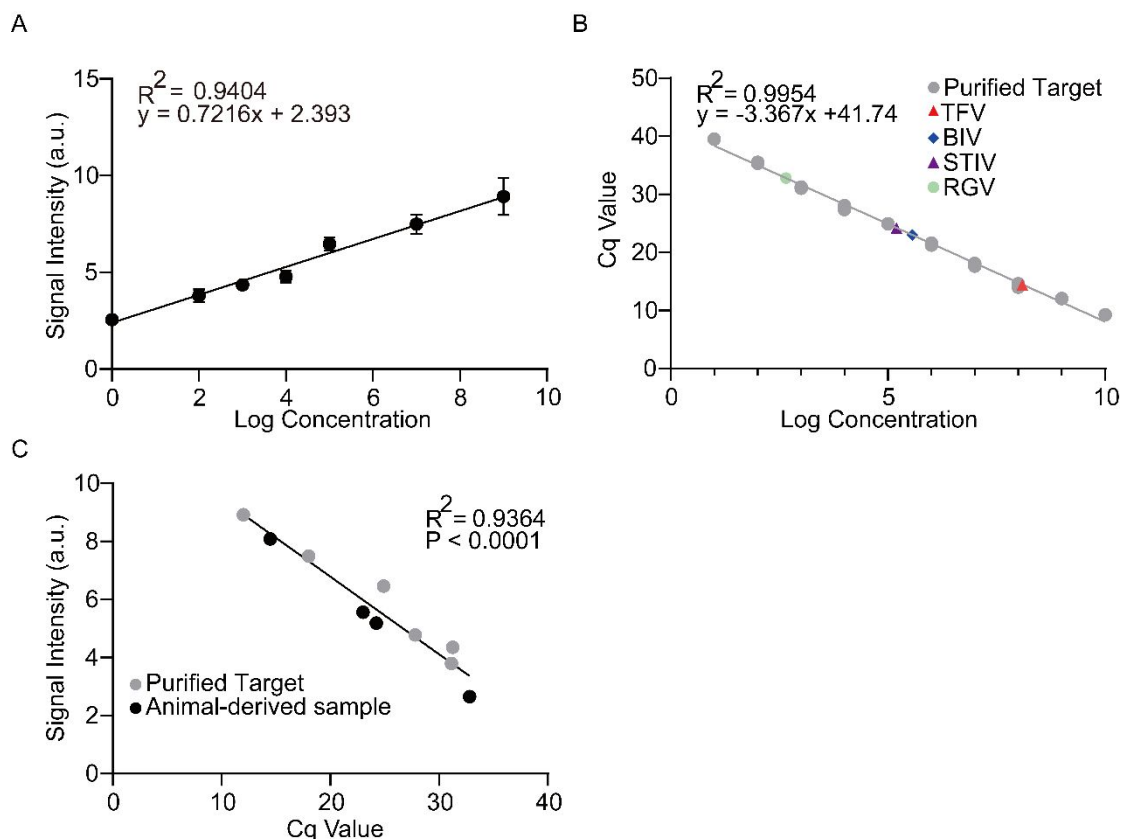

**Figure S3.** Standard curve of the proposed system and qPCR. **(A)** Concentration-signal intensity curve of DNA concentration and smartphone images. The standard samples with purified target DNA of 10 aM, 100 aM, 1 fM, 10 fM, 1 pM, 100 pM, and control DNA of 100 pM are detected by crRNA-3 with RPA-CRISPR/Cas12a-smartphone microscopy. **(B)** Concentration-signal intensity curve of qPCR. The standard samples with purified target DNA of 1 aM, 10 aM, 100 aM, 1 fM, 10 fM, 10 pM, 100 pM, 1 nM, are detected by qPCR. The concentration of each clinical sample is estimated according to this calibration curve. **(C)** The correlation analysis of FV3 detection results obtained through RPA-CRISPR/Cas12a-SPM system and qPCR. The fluorescence signal intensity and Cq value of each sample are co-analyzed.

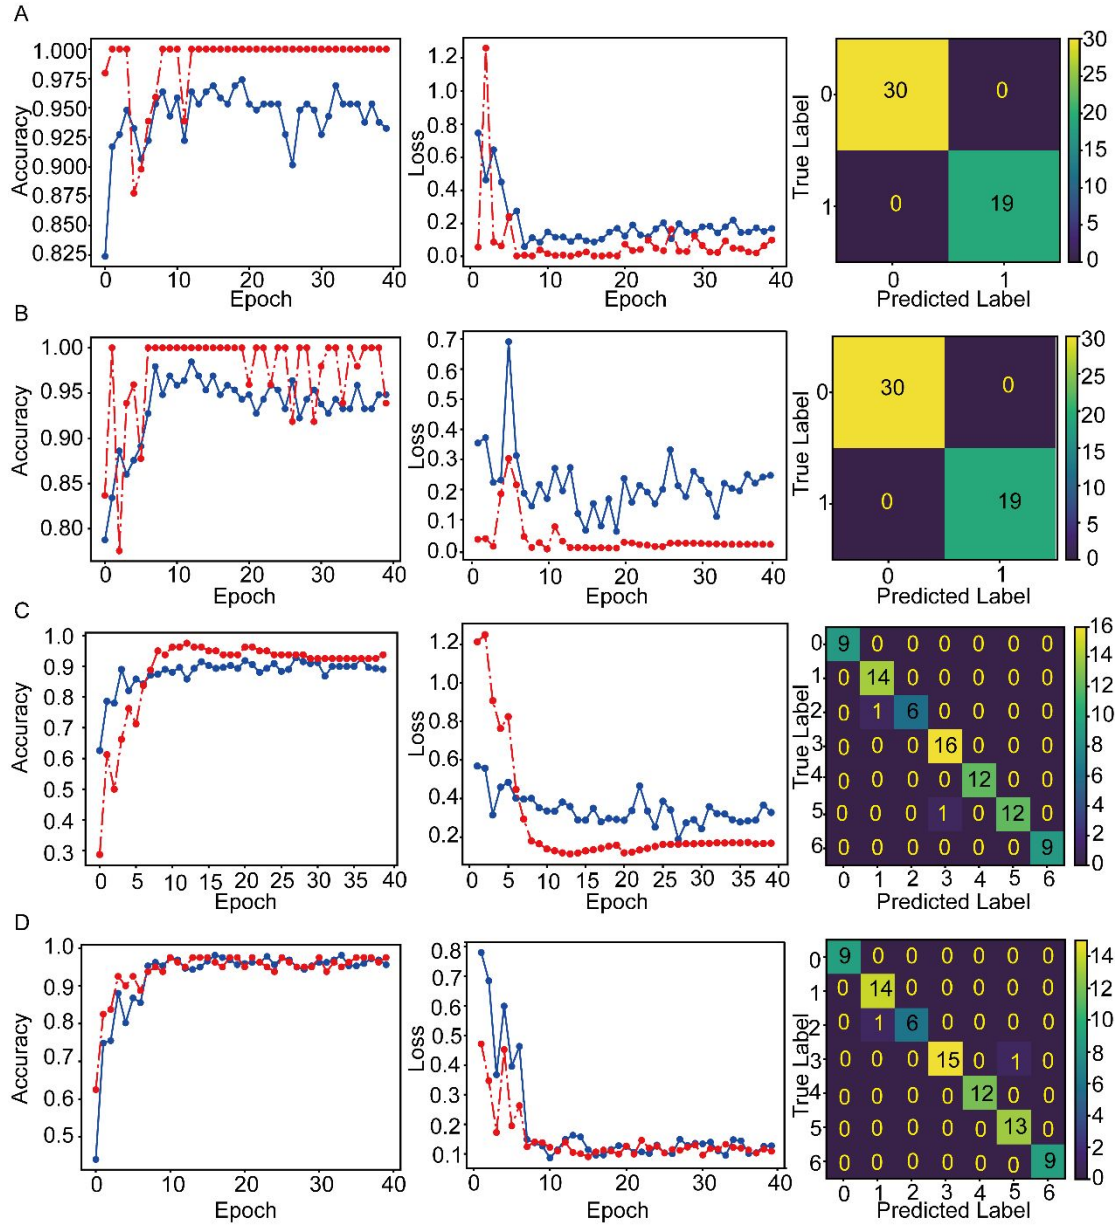

**Figure S4.** Evaluation of Deep learning models for classification of fluorescence images. **(A)** Evaluation of DenseNet-121 for binary classification. **(B)** Evaluation of AlexNet for binary classification. **(C)** Evaluation of efficientNet-B7 for multiclass classification. **(D)** Evaluation of DenseNet-121 for multiclass classification.
